# Supplementary material for: Interspecific in vitro assay for the chimera-forming ability of human pluripotent stem cells
Source: Oxford University Press journal article supplement (doi:10.1242/dev.124016), 2015-01-01
Supplement: dev124016supp.pdf [file dev124016supp.pdf]

## Supplemental Methods

### ***In vitro* development of mouse pre-implantation embryos**

Embryos collected 2.5 days post-coitum in Medium 2 [Millipore] from oviduct and uterus of C57BL/6 female mice mated with DBA/2 male mice were cultured in KSOM [Millipore] for 1 DIV, permitting the embryos to develop into blastocysts. The cells to be assayed were injected into morula or blastocyst embryos; differences in results between the two were not appreciated. Blastocyst embryos were plated onto mitomycin C-treated mouse embryonic fibroblast (MEF)-coated dishes or Matrigel [Becton Dickinson]-coated dishes and were cultured in Connaught Medical Research Laboratories (CMRL) 1066-based medium supplemented with 1% non-essential amino acids (NEAA), 0.1mM  $\beta$ -mercaptoethanol, and 2mM Glutamax [all Life Technologies] (CMRL-based medium) and with sera. CMRL-based medium supplemented with 10% fetal bovine serum (FBS) was used from 1 DIV to 3 DIV. An equal volume of CMRL-based medium containing 30% FBS was added at 3 DIV to raise the final FBS concentration to 20%. After attachment at 4 DIV, medium was replaced with CMRL medium supplemented with 10% FBS and 30% rat IC (immediately centrifuged) serum [Charles River Laboratories Japan, Yokohama]. CMRL medium supplemented with 50% rat IC serum was used from 5 DIV and was exchanged daily. All media were placed in an incubator for 1-2 hours before feeding to adjust temperature and pH. Rat IC serum was supplemented with 2 mg/ml glucose. Stirred culture supported normal development beyond egg-cylinder stage.

### **Preparation of rodent ESC / iPSC lines**

A *DsRed*-expressing mouse ESC line (EB3DR), a *tdTomato*-expressing rat ESC line (BLK-RT2) (Kobayashi et al., 2012), and a rat iPSC line (T1-3) (Hamanaka et al., 2011) were assayed. T1-3 cells were labeled with tdTomato as were hiPSCs. These rodent PSC lines were cultured in mouse ESC medium (DMEM / F12: Neurobasal medium supplemented with 1% volume of fraction V bovine serum albumin, 2 mM Glutamax, 1% NEAA, 0.5% N2 supplement, and 1% B27 supplement [all Life Technologies], and 1,000 U/ml of mouse LIF [Millipore, MA], 1  $\mu$ M of CHIR99021, and 1  $\mu$ M of PD0325901. Rat ESC and iPSC lines were maintained on mitomycin-C-treated MEF-coated dishes. Mouse ESCs were maintained on 0.1% gelatin-coated dishes.

### **Preparation of rat EpiSC lines**

The rat EpiSC line was derived from a BLK-RT2-injected interspecies chimera developed *in vivo*, and was established from a BLK-RT2-injected interspecies chimeric E6.5 embryo. Rat EpiSCs that expressed tdTomato were purified by cell sorting. Rat EpiSCs were maintained in hESC medium on mitomycin-C-treated MEF feeder cells.

### **Preparation of nonhuman primate ESC lines**

We used an established CMK6 cynomolgus monkey ESC line (Suemori et al., 2001). Cell culture and labeling with *tdTomato* were performed as with hiPSCs.

### **Immunohistochemistry for primordial germ cells**

Frozen sections were made from genital ridges obtained from E13.5 EpiSC-sub cells derived chimeric embryos. The sections were incubated with anti-Mvh antibody (ab13840; 1:200 dilution; Abcam, Cambridge, UK), were washed with PBS, and then were stained with Alexa Fluor 647 conjugated anti-rabbit IgG antibody (Life Technologies) to mark primordial germ cells. Nuclei were stained with DAPI (Wako Pure Chemicals). Fluorescence microscopy was performed using a BZ-9000 microscope (Keyence, Osaka, Japan).

### **Flow-cytometry analysis**

For flow-cytometry analysis, cells were dissociated into single cells using Accutase (Innovative Cell Technologies, San Diego, CA), and then stained with APC-conjugated anti-mouse CD31 antibody (390; BioLegend, San Diego, CA), isotype control (R35-95; BD Biosciences, San Jose, CA), or anti-SSEA1 antibody (MC-480; eBioscience, San Diego, CA) antibody. The stained cells were analyzed using a FACSCanto flow cytometer (BD Biosciences).

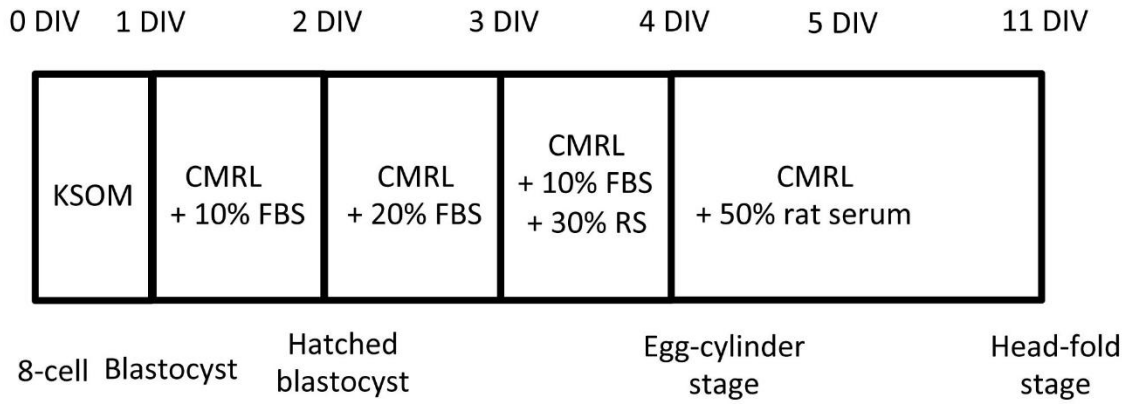

**Fig. S1. Stepwise culture conditions for *in vitro* development of mouse pre-implantation embryos**

The figure illustrates culture media and expected developmental stages at each culture day.

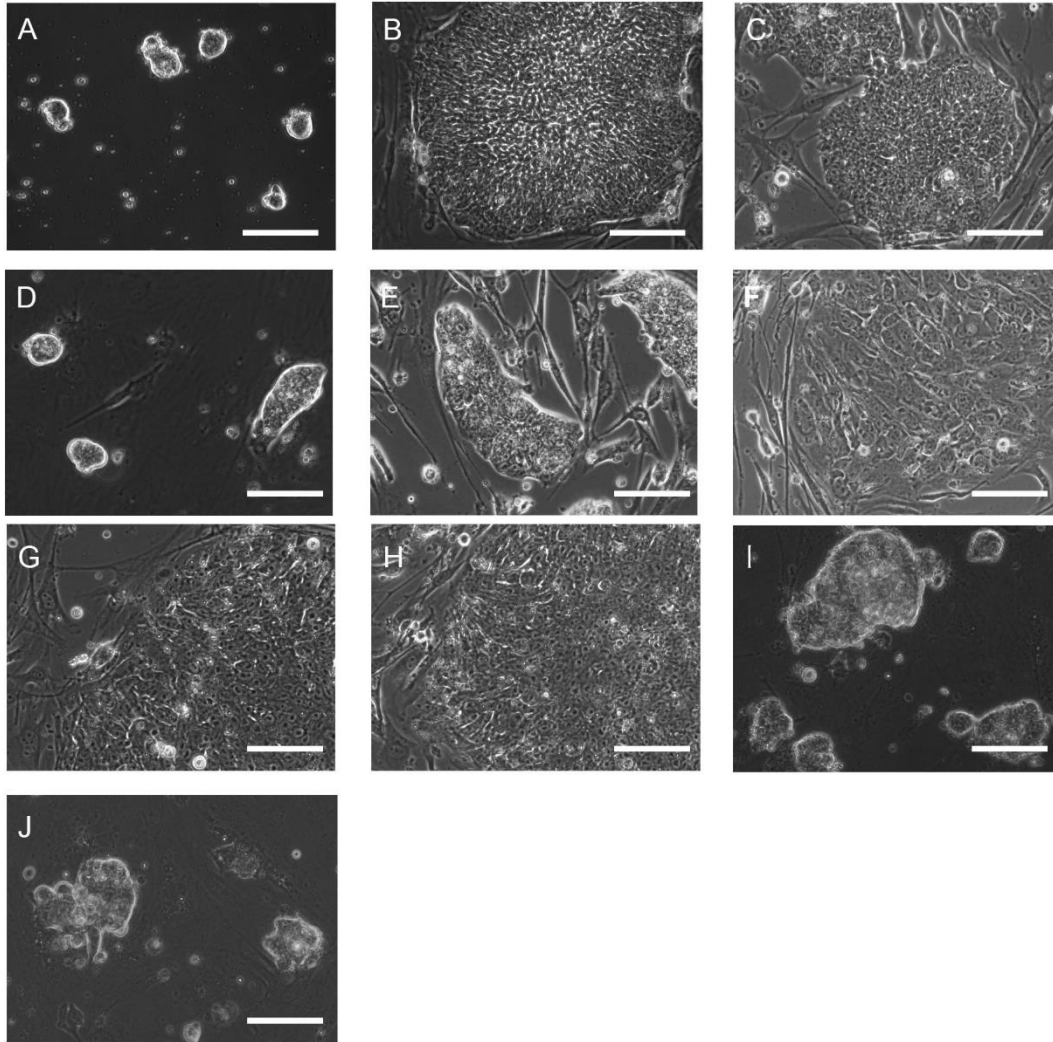

**Fig. S2. Appearances of engrafted cell lines**

Brightfield images of the lines used in the assay. (A) EB3DR mouse ESC. (B) Parental mouse EpiSC of EpiSC-sub line. (C) EpiSC-sub line. (D) BLK-RT2 rat ESC. (E) BLK-RT2 EpiSC. (F) CMK6 monkey ESC. (G) Parental human iPSC of DR-hiPSC. (H) DR-hiPSC. (I-J) Human naïve-like PSCs cultured with 2iL and Dox (I), or with 2iL and PKCi 2 weeks after withdrawal of Dox (J). Note that EpiSC-sub cells and DR-hiPSCs are morphologically similar to their respective parental cells. Scale bar indicates 100 μm.

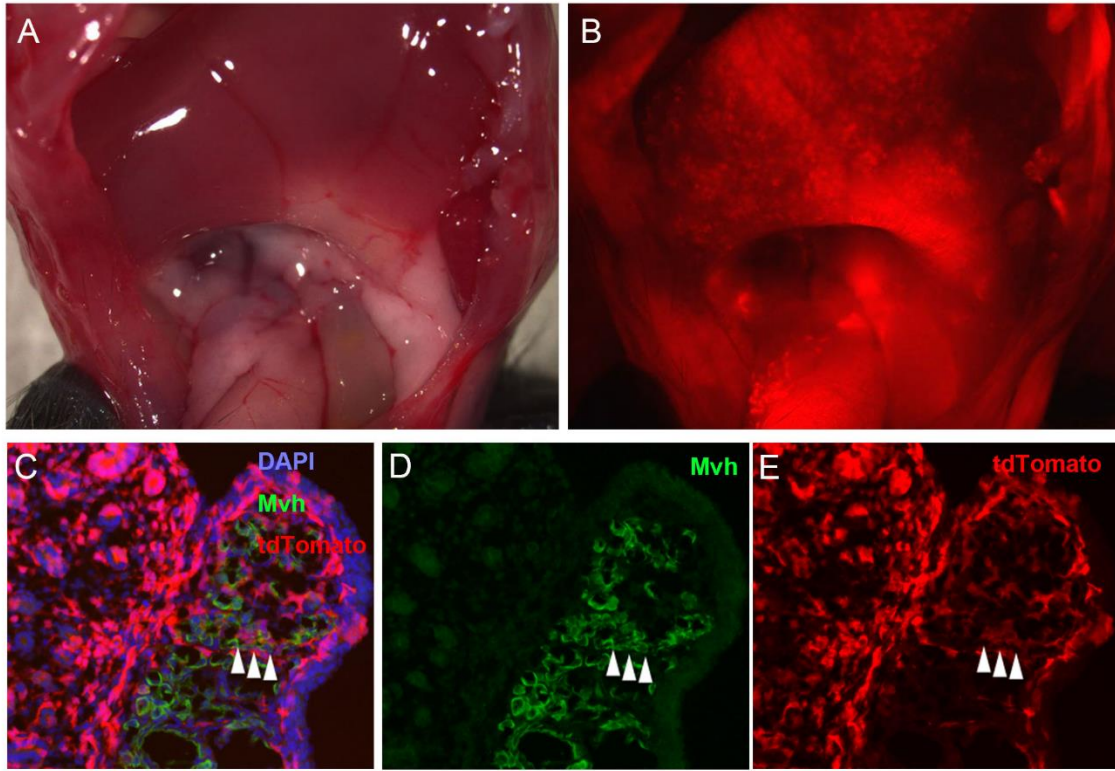

**Fig. S3. Distribution of EpiSC-sub cells-derived progeny**

(A, B) Chimeric offspring were sacrificed at postnatal day 14 and analyzed for the distribution of tdTomato-labeled descendants of EpiSC-sub cells. Fluorescence images indicate that EpiSC-sub cells contributed to bone, skeletal muscle, liver, pancreas, and most observed organs (B). (C-E) To clarify germline contribution, frozen sections of genital ridges obtained from E13.5 chimeric embryos were stained using antibody against Mvh, a PGC marker. (C) Overlaid image of DAPI staining, Mvh antibody staining (D), and tdTomato expression (E). Arrowheads indicate co-localization of tdTomato expression and Mvh staining.



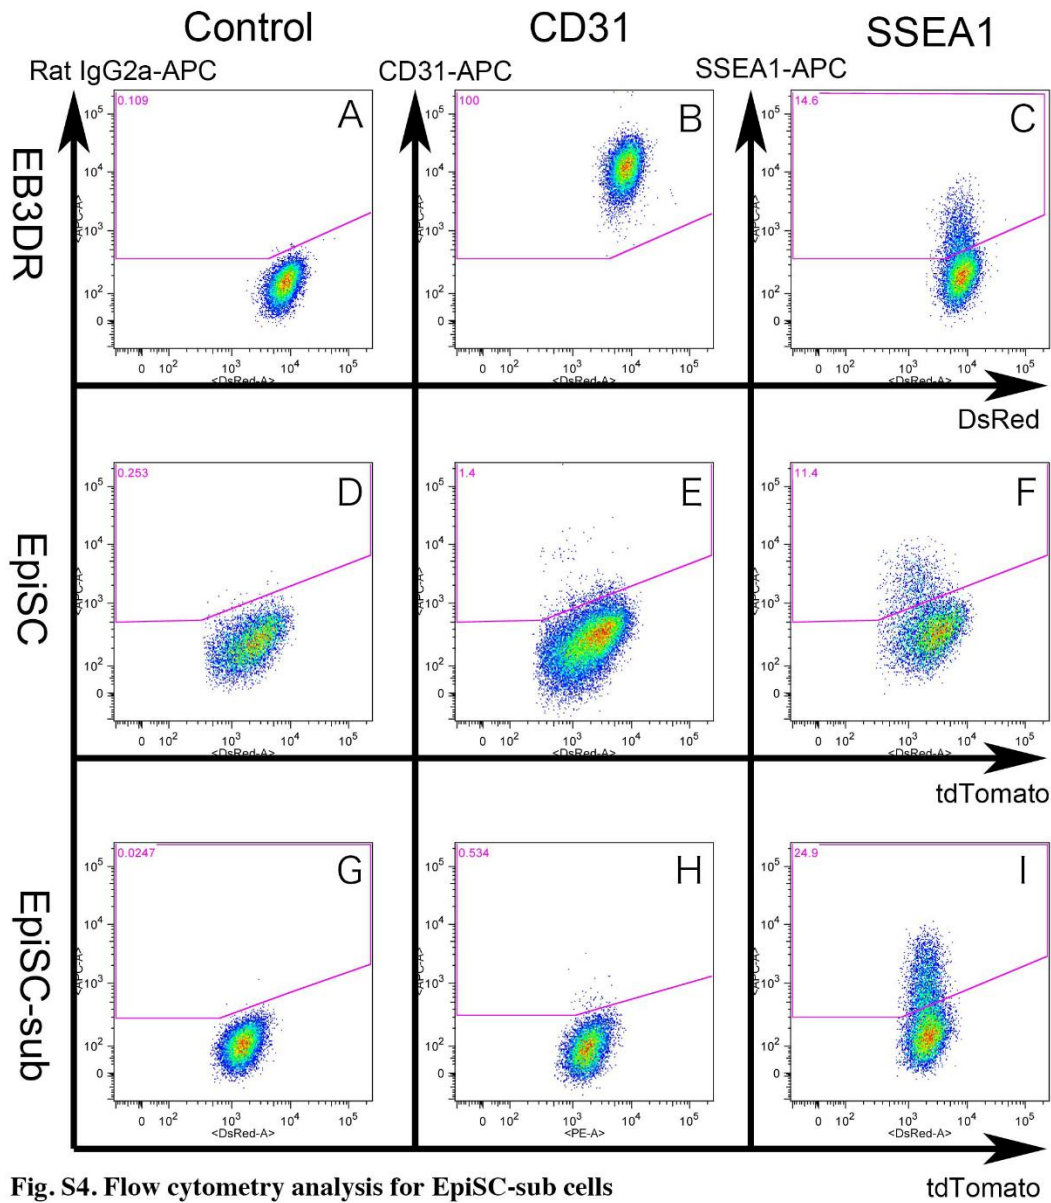

EB3DR mouse ESCs (A-C), parental EpiSCs (D-E), and EpiSC-sub cells were stained with APC-conjugated anti-mouse CD31 antibody (B, E, H) or anti-SSEA1 antibody (C, F, I). Indicated controls (A, D, G) were stained with APC-conjugated isotype control antibody for anti-mouse CD31 antibody.

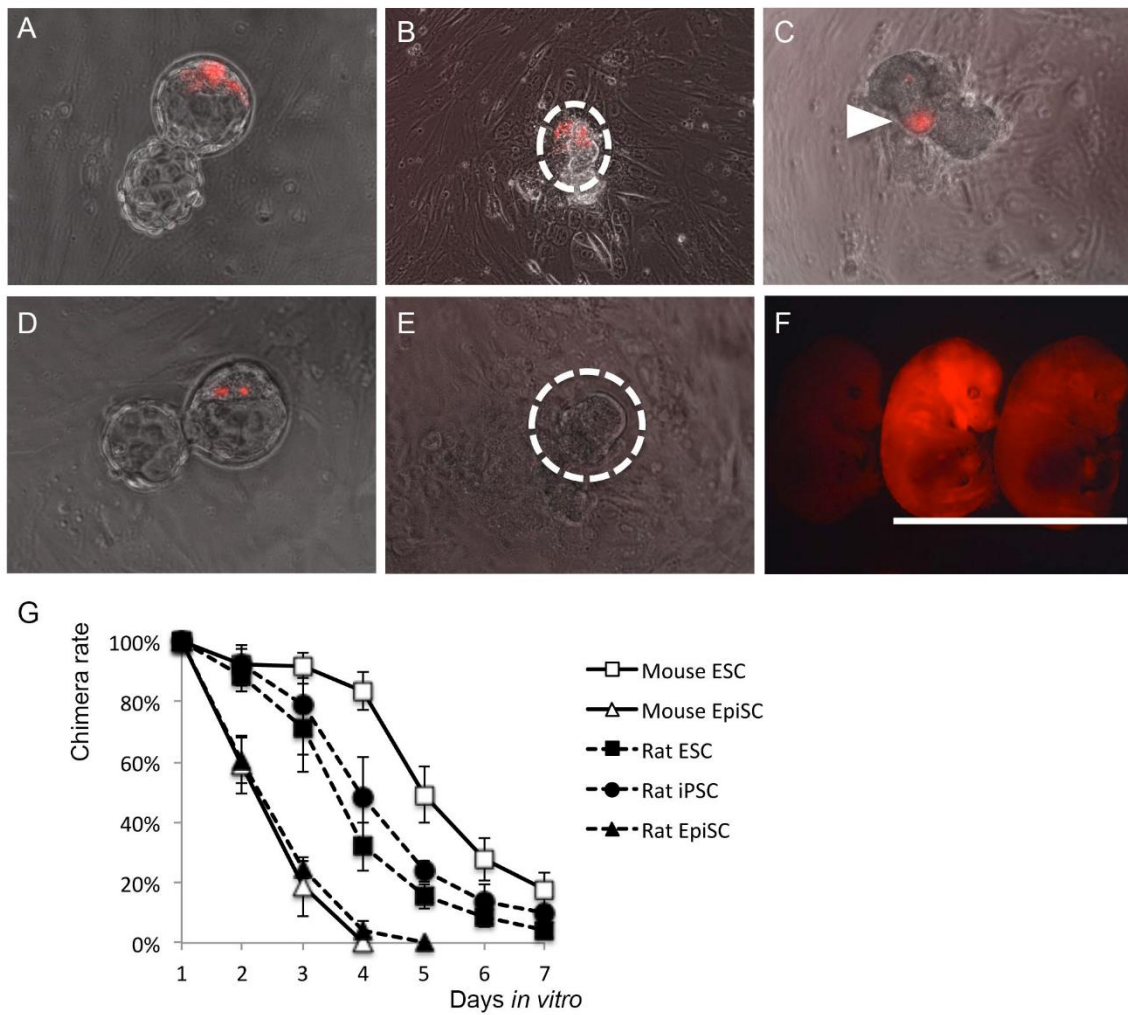

**Fig. S5. Interspecies in vitro chimera assay: Rat PSCs.**

To clarify whether our in vitro chimera assay results held for interspecies chimeras, rat ESCs, iPSCs, and EpiSCs were tested for chimera formation ability in vitro. (A-E) Overlaid images show the distribution of engrafted rat ESC- (A-C) or EpiSC (D, E) -derived cells in red at 2 DIV (A, D), 4 DIV (B, E), and 7 DIV (F). (F) Fluorescence-microscopy image of rat ESC-derived interspecies chimera developed in vivo. (G) Plots indicate proportion of rat ESCs-, iPSCs-, or EpiSCs-injected chimeric embryos compared with mouse ESC- or EpiSC-injected embryos at each culture day.

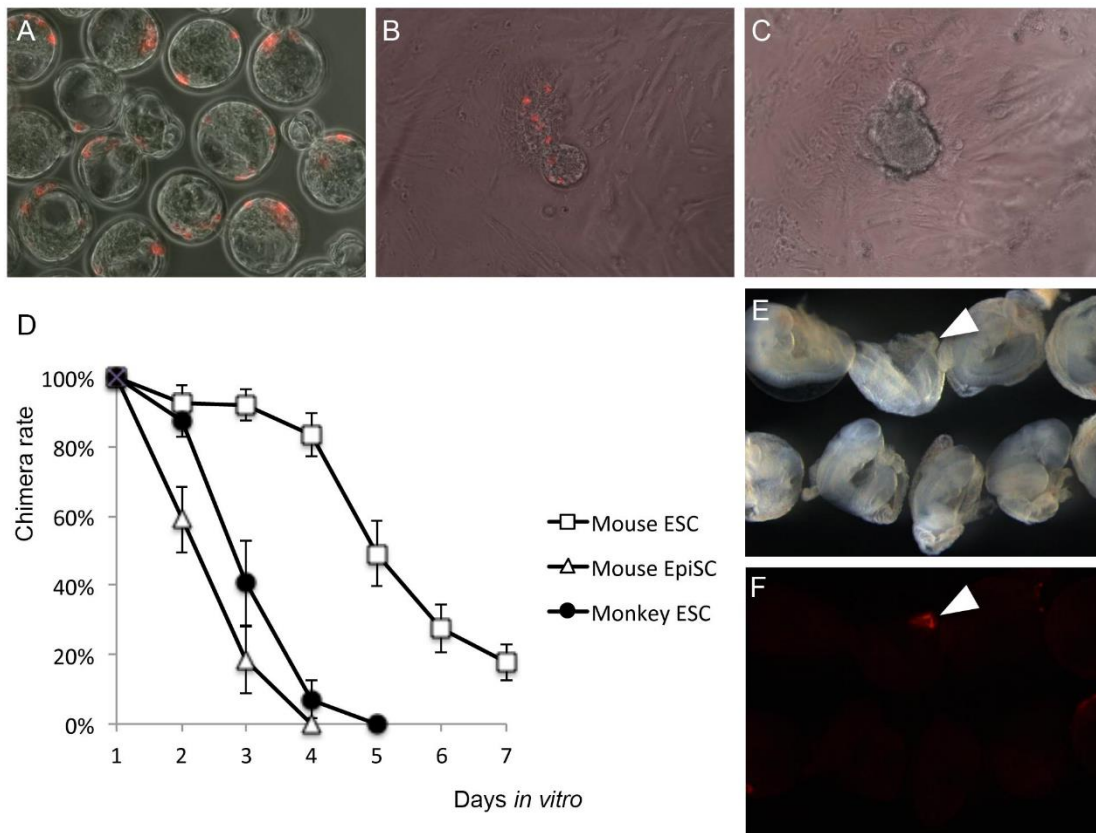

**Fig. S6. Interspecies in vitro chimera assay: Monkey PSCs.**

To clarify whether interspecies-in vitro chimera assay results held for primates, monkey ESC-line CMK6 cells labeled with tdTomato were subjected to interspecies-in vitro chimera assay. (A-C) Overlaid images show the distribution of monkey ESC-derived cells in red at 2 DIV (A), 4 DIV (B), and 6 DIV (C). (D) Plots indicate proportion of CMK6-derived chimeric embryos among started embryos at each culture day. (E, F) In vivo chimera assay was also performed for CMK6 cells. E8.5 embryos were observed by brightfield (E) and fluorescence (F) microscopy. Arrowhead indicates autofluorescent placental tissue.



**Table S1. Results of in vitro chimera assay with mouse embryos****Mouse ESC**

|      | No. of chimera | Chimera rate |
|------|----------------|--------------|----------------|--------------|----------------|--------------|----------------|--------------|
| 1DIV | 50             | 100%         | 21             | 100%         | 20             | 100%         | 30             | 100%         |
| 2DIV | 49             | 98%          | 20             | 95%          | 18             | 90%          | 26             | 87%          |
| 3DIV | 48             | 96%          | 20             | 95%          | 18             | 90%          | 26             | 87%          |
| 4DIV | 45             | 90%          | 18             | 86%          | 15             | 75%          | 25             | 83%          |
| 5DIV | 31             | 62%          | 10             | 48%          | 8              | 40%          | 14             | 47%          |
| 6DIV | 18             | 36%          | 5              | 24%          | 6              | 30%          | 6              | 20%          |
| 7DIV | 11             | 22%          | 4              | 19%          | 4              | 20%          | 3              | 10%          |

**Mouse EpiSC**

|      | No. of chimera | Chimera rate |
|------|----------------|--------------|----------------|--------------|----------------|--------------|----------------|--------------|----------------|--------------|
| 1DIV | 40             | 100%         | 30             | 100%         | 31             | 100%         | 28             | 100%         | 33             | 100%         |
| 2DIV | 23             | 58%          | 15             | 50%          | 17             | 55%          | 21             | 75%          | 19             | 58%          |
| 3DIV | 5              | 13%          | 4              | 13%          | 5              | 16%          | 10             | 36%          | 5              | 15%          |
| 4DIV | 0              | 0%           | 0              | 0%           | 0              | 0%           | 0              | 0%           | 0              | 0%           |
| 5DIV | 0              | 0%           | 0              | 0%           | 0              | 0%           | 0              | 0%           | 0              | 0%           |
| 6DIV | 0              | 0%           | 0              | 0%           | 0              | 0%           | 0              | 0%           | 0              | 0%           |
| 7DIV | 0              | 0%           | 0              | 0%           | 0              | 0%           | 0              | 0%           | 0              | 0%           |

**EpiSC-sub**

|      | No. of chimera | Chimera rate | No. of chimera | Chimera rate | No. of chimera | Chimera rate |
|------|----------------|--------------|----------------|--------------|----------------|--------------|
| 1DIV | 30             | 100%         | 30             | 100%         | 33             | 100%         |
| 2DIV | 25             | 83%          | 27             | 90%          | 24             | 73%          |
| 3DIV | 20             | 67%          | 21             | 70%          | 24             | 73%          |
| 4DIV | 15             | 50%          | 13             | 43%          | 21             | 64%          |
| 5DIV | 8              | 27%          | 7              | 23%          | 12             | 36%          |
| 6DIV | 3              | 10%          | 4              | 13%          | 5              | 15%          |
| 7DIV | 2              | 7%           | 3              | 10%          | 4              | 12%          |

**Rat ESC**

|      | No. of chimera | Chimera rate |
|------|----------------|--------------|----------------|--------------|----------------|--------------|----------------|--------------|----------------|--------------|
| 1DIV | 36             | 100%         | 30             | 100%         | 27             | 100%         | 40             | 100%         | 24             | 100%         |
| 2DIV | 31             | 92%          | 28             | 93%          | 24             | 89%          | 36             | 90%          | 19             | 79%          |
| 3DIV | 27             | 75%          | 25             | 83%          | 21             | 78%          | 30             | 75%          | 11             | 46%          |
| 4DIV | 8              | 22%          | 11             | 37%          | 11             | 41%          | 14             | 35%          | 6              | 25%          |
| 5DIV | 5              | 8%           | 5              | 17%          | 5              | 19%          | 7              | 18%          | 4              | 17%          |
| 6DIV | 2              | 6%           | 3              | 10%          | 3              | 11%          | 5              | 13%          | 1              | 4%           |
| 7DIV | 2              | 6%           | 1              | 3%           | 2              | 7%           | 2              | 5%           | 0              | 0%           |

**Rat iPSC**

|      | No. of chimera | Chimera rate |
|------|----------------|--------------|----------------|--------------|----------------|--------------|----------------|--------------|
| 1DIV | 50             | 100%         | 50             | 100%         | 24             | 100%         | 27             | 100%         |
| 2DIV | 47             | 94%          | 41             | 82%          | 23             | 96%          | 26             | 96%          |
| 3DIV | 37             | 74%          | 29             | 58%          | 23             | 96%          | 24             | 89%          |
| 4DIV | 21             | 42%          | 16             | 32%          | 15             | 63%          | 15             | 56%          |
| 5DIV | 11             | 22%          | 11             | 22%          | 7              | 29%          | 6              | 22%          |
| 6DIV | 4              | 8%           | 8              | 16%          | 5              | 21%          | 3              | 11%          |
| 7DIV | 2              | 4%           | 6              | 12%          | 4              | 17%          | 2              | 7%           |

**Rat EpiSC**

|      | No. of chimera | Chimera rate | No. of chimera | Chimera rate | No. of chimera | Chimera rate |
|------|----------------|--------------|----------------|--------------|----------------|--------------|
| 1DIV | 23             | 100%         | 27             | 100%         | 24             | 100%         |
| 2DIV | 12             | 52%          | 18             | 67%          | 15             | 63%          |
| 3DIV | 6              | 26%          | 7              | 26%          | 5              | 21%          |
| 4DIV | 0              | 0%           | 2              | 7%           | 1              | 4%           |
| 5DIV | 0              | 0%           | 0              | 0%           | 0              | 0%           |
| 6DIV | 0              | 0%           | 0              | 0%           | 0              | 0%           |
| 7DIV | 0              | 0%           | 0              | 0%           | 0              | 0%           |

**Monkey ESC**

|      | No. of chimera | Chimera rate |
|------|----------------|--------------|----------------|--------------|----------------|--------------|----------------|--------------|
| 1DIV | 36             | 100%         | 40             | 100%         | 40             | 100%         | 40             | 100%         |
| 2DIV | 32             | 89%          | 33             | 83%          | 34             | 85%          | 31             | 78%          |
| 3DIV | 11             | 31%          | 13             | 33%          | 19             | 48%          | 12             | 30%          |
| 4DIV | 2              | 6%           | 0              | 0%           | 4              | 10%          | 2              | 5%           |
| 5DIV | 0              | 0%           | 0              | 0%           | 0              | 0%           | 0              | 0%           |
| 6DIV | 0              | 0%           | 0              | 0%           | 0              | 0%           | 0              | 0%           |
| 7DIV | 0              | 0%           | 0              | 0%           | 0              | 0%           | 0              | 0%           |

**Human iPSC**

|      | No. of chimera | Chimera rate |
|------|----------------|--------------|----------------|--------------|----------------|--------------|----------------|--------------|----------------|--------------|
| 1DIV | 40             | 100%         | 34             | 100%         | 50             | 100%         | 36             | 100%         | 54             | 100%         |
| 2DIV | 33             | 83%          | 29             | 85%          | 43             | 86%          | 32             | 89%          | 44             | 81%          |
| 3DIV | 11             | 28%          | 16             | 47%          | 12             | 24%          | 13             | 36%          | 13             | 24%          |
| 4DIV | 5              | 13%          | 7              | 21%          | 3              | 6%           | 5              | 14%          | 3              | 6%           |
| 5DIV | 0              | 0%           | 0              | 0%           | 0              | 0%           | 0              | 0%           | 0              | 0%           |
| 6DIV | 0              | 0%           | 0              | 0%           | 0              | 0%           | 0              | 0%           | 0              | 0%           |
| 7DIV | 0              | 0%           | 0              | 0%           | 0              | 0%           | 0              | 0%           | 0              | 0%           |
|      | No. of chimera | Chimera rate |
| 1DIV | 35             | 100%         | 30             | 100%         | 26             | 100%         | 20             | 100%         | 20             | 100%         |
| 2DIV | 31             | 89%          | 19             | 63%          | 19             | 73%          | 13             | 65%          | 14             | 70%          |
| 3DIV | 23             | 66%          | 7              | 23%          | 9              | 35%          | 3              | 15%          | 6              | 30%          |
| 4DIV | 3              | 9%           | 0              | 0%           | 4              | 15%          | 0              | 0%           | 0              | 0%           |
| 5DIV | 0              | 0%           | 0              | 0%           | 0              | 0%           | 0              | 0%           | 0              | 0%           |
| 6DIV | 0              | 0%           | 0              | 0%           | 0              | 0%           | 0              | 0%           | 0              | 0%           |
| 7DIV | 0              | 0%           | 0              | 0%           | 0              | 0%           | 0              | 0%           | 0              | 0%           |

**DR-hiPSC**

|      | No. of chimera | Chimera rate |
|------|----------------|--------------|----------------|--------------|----------------|--------------|----------------|--------------|----------------|--------------|
| 1DIV | 50             | 100%         | 28             | 100%         | 30             | 100%         | 26             | 100%         | 26             | 100%         |
| 2DIV | 40             | 80%          | 21             | 75%          | 25             | 83%          | 19             | 73%          | 19             | 73%          |
| 3DIV | 18             | 36%          | 11             | 39%          | 13             | 43%          | 15             | 58%          | 9              | 35%          |
| 4DIV | 6              | 12%          | 4              | 14%          | 2              | 7%           | 11             | 42%          | 4              | 15%          |
| 5DIV | 3              | 6%           | 1              | 4%           | 0              | 0%           | 6              | 23%          | 0              | 0%           |
| 6DIV | 0              | 0%           | 0              | 0%           | 0              | 0%           | 0              | 0%           | 0              | 0%           |
| 7DIV | 0              | 0%           | 0              | 0%           | 0              | 0%           | 0              | 0%           | 0              | 0%           |

**Reset cell**

|      | No. of chimera | Chimera rate | No. of chimera | Chimera rate | No. of chimera | Chimera rate |
|------|----------------|--------------|----------------|--------------|----------------|--------------|
| 1DIV | 40             | 100%         | 40             | 100%         | 41             | 100%         |
| 2DIV | 33             | 83%          | 31             | 78%          | 31             | 76%          |
| 3DIV | 13             | 33%          | 16             | 40%          | 18             | 44%          |
| 4DIV | 4              | 10%          | 5              | 13%          | 2              | 5%           |
| 5DIV | 0              | 0%           | 0              | 0%           | 0              | 0%           |
| 6DIV | 0              | 0%           | 0              | 0%           | 0              | 0%           |
| 7DIV | 0              | 0%           | 0              | 0%           | 0              | 0%           |

**Table S2. Results of *in vivo* chimera assay with mouse embryos**

| Graft cell type      | Grafted cell line   | Host embryos | Recipients | Analyzed stage | Pups (Fetus) | Chimera | Chimera rate |
|----------------------|---------------------|--------------|------------|----------------|--------------|---------|--------------|
| mouse ESC            | EB3DR-P25           | 60           | 3          | Neonate        | 13           | 10      | 77%          |
|                      | EB3DR-P27           | 20           | 1          | E9.5           | 11           | 8       | 73%          |
|                      | EB3DR-P27           | 20           | 1          | E13.5          | 9            | 6       | 67%          |
| mouse iPSC           | GT3.2-P18           | 40           | 2          | E13.5          | 21           | 16      | 76%          |
|                      | GT3.2-P19           | 80           | 4          | Neonate        | 22           | 12      | 55%          |
|                      | GT3.2-P19           | 80           | 4          | Neonate        | 26           | 14      | 54%          |
|                      | GT3.2-P21           | 80           | 4          | Neonate        | 23           | 16      | 70%          |
|                      | GT3.2-P21           | 80           | 4          | Neonate        | 21           | 13      | 62%          |
| mouse iPSC           | EB3DR-EpiSC-P8+3    | 40           | 2          | E9.5           | 26           | 0       | 0%           |
|                      | BDF1-EpiSC-tdT-P5+2 | 20           | 1          | E9.5           | 11           | 0       | 0%           |
|                      | BDF1-EpiSC-tdT-P5+4 | 20           | 1          | E7.5           | 15           | 0       | 0%           |
|                      | BDF1-EpiSC-tdT-P5+4 | 20           | 1          | E6.5           | 10           | 0       | 0%           |
|                      | BDF1-EpiSC-tdT-P5+7 | 20           | 1          | E9.5           | 12           | 0       | 0%           |
|                      | EpiSC-tdT-P35+15    | 40           | 2          | E9.5           | 21           | 0       | 0%           |
| mouse EpiSC subclone | EpiSC-sub-P35+7     | 20           | 1          | E9.5           | 17           | 4       | 24%          |
|                      | EpiSC-sub-P35+8     | 20           | 1          | E9.5           | 20           | 7       | 35%          |
|                      | EpiSC-sub-P35+8     | 20           | 1          | Neonate        | 8            | 3       | 38%          |
|                      | EpiSC-sub-P35+15    | 40           | 2          | E9.5           | 21           | 8       | 38%          |
| rat ESC              | BLK-RT2-P24         | 80           | 4          | Neonate        | 15           | 7       | 47%          |
|                      | BLK-RT2-P25         | 20           | 1          | E9.5           | 12           | 4       | 33%          |
| rat iPSC             | riPSC-WI-T1-3-P24   | 80           | 4          | Neonate        | 17           | 7       | 41%          |
| rat EpiSC            | BLK-RT2-EpiSC-P6    | 40           | 2          | E9.5           | 25           | 0       | 0%           |
|                      | BLK-RT2-EpiSC-P7    | 17           | 1          | E9.5           | 12           | 0       | 0%           |
|                      | BLK-RT2-EpiSC-P8    | 32           | 2          | E9.5           | 22           | 0       | 0%           |
